# Supplementary material
Source: HighWire-hosted journal article supplement (https://hw-f5-jim.highwire.org/content/jim-2020-001707)
Supplement: inline-supplementary-material-1 [file inline-supplementary-material-1.pdf]

Supplementary Table: Used ICD-10 codes

|                                       | ICD-10 codes                                                           |
|---------------------------------------|------------------------------------------------------------------------|
| <b>Diagnosis codes</b>                |                                                                        |
| AF                                    | 148.0, 148.1, 148.2, 148.91                                            |
| SLE                                   | M32                                                                    |
| <b>Procedure codes</b>                |                                                                        |
| Ablation                              | 0258                                                                   |
| Pharmacologic cardioversion           | 3E030RZ, 3E033RZ, 3E040RZ, 3E043RZ, 3E050RZ, 3E053RZ, 3E060RZ, 3E063RZ |
| <b>Comorbidities</b>                  |                                                                        |
| Dyslipidemia                          | E78                                                                    |
| Old MI                                | I252                                                                   |
| Old PCI                               | Z9861                                                                  |
| Old CABG                              | Z951                                                                   |
| Old pacemaker                         | Z950                                                                   |
| AICD                                  | Z95810                                                                 |
| Chronic obstructive pulmonary disease | J41, J42, J43, J44                                                     |
| Carotid artery disease                | I652                                                                   |
| Old stroke                            | I63                                                                    |
| Hypertension                          | I10                                                                    |
| Peripheral vascular disease           | I739                                                                   |
| Hypothyroidism                        | E03                                                                    |
| Diabetes Mellitus Type 1&2            | E10, E11                                                               |
| Obesity                               | E660, E6601, E6609, E661, E662, E668, E669                             |
| Congestive heart Failure              | I50                                                                    |
| Chronic Kidney Disease                | N18                                                                    |
| Liver disease                         | K70, K71, K72, K73, K74, K75, K76, K77                                 |
| Electrolyte derangement               | E870, E871, E872, E873, E874, E875, E876                               |
| Maintenance dialysis                  | Z992                                                                   |
| Oxygen dependence                     | Z9981                                                                  |
| Smoking                               | Z87891, F17200                                                         |
| Anemia                                | D50, D51, D52, D53, D55, D56, D57, D58, D59, D60, D61, D62, D63, D64   |

## Abbreviations:

AF: Atrial fibrillation, SLE: Systemic Lupus Erythematosus, MI: Myocardial infarction, PCI: percutaneous coronary intervention, CABG: Coronary artery bypass graft, COPD: Chronic obstructive pulmonary disease, DM: Diabetes Mellitus, CHF: Chronic congestive heart failure, CKD: Chronic kidney disease, O2: oxygen, AICD: presence of Automated implantable cardioverter defibrillator, median household income: median household income for patient's Zip code, ICD-10, International classification of diseases, tenth revision.
